# Supplementary material for: Use of design of experiments to optimize the production of microbial probiotic biofilms
Source: PeerJ. 2018 Jul 10;6:e4826. doi: 10.7717/peerj.4826 (PMC6044272; doi:10.7717/peerj.4826)
Supplement: Supplemental Information 1 — Each data point indicates the mean value of two or more repetitions. [file peerj-06-4826-s001.xlsx]

## Sheet: phase 1
	Stainless steel						Glass						Polycarbonate
	Mean value
	log CFU/cm2	log CFU/cm2	log CFU/cm2	log CFU/cm2	log CFU/cm2		log CFU/cm2	log CFU/cm2	log CFU/cm2	log CFU/cm2	log CFU/cm2		log CFU/cm2	log CFU/cm2	log CFU/cm2	log CFU/cm2	log CFU/cm2
time (day )	10140	20213	20096	20088	20219		10140	20213	20096	20088	20219		10140	20213	20096	20088	20219
0.5	3.15147	3.04632	3.4988	2.09348	2.90159		3.26116	3.21658	3.14047	3.09348	3.0415		3.45658	3.09116	3.34058	2.95116	3.57058
0.5	3.09841	3.05147	3.52022	2.15147	2.96438		3.22048	3.2261	3.05456	3.04772	3.03841		3.4661	3.05048	3.3501	2.91048	3.5801
1	4.01181	4.01181	4.37871	5.64632	4.56098		4.1988	4.13783	4.88386	4.2976	4.27163		4.37783	4.0288	4.26183	3.8888	4.49183
1	4.21686	4.21686	4.66998	5.69242	4.41273		4.73693	4.70777	4.34529	4.4525	4.30528		4.94777	4.56693	4.83177	4.42693	5.06177
2	4.68295	4.58343	5.12228	6.86852	5.12919		4.94735	4.90159	4.40674	5.43022	4.7017		5.14159	4.77735	5.02559	4.63735	5.25559
2	4.80468	4.56122	5.75624	6.70777	5.33474		4.16746	4.93371	4.86116	4.81423	4.35559		5.17371	3.99746	5.05771	4.85746	5.28771
3	4.48893	4.52254	4.46849	6.26541	4.52941		4.12919	4.71078	4.75789	5.06129	4.30146		4.25078	3.95919	4.83478	4.81919	5.06478
3	4.81658	4.38826	5.45789	5.93322	4.89576		nd	nd	4.76689	5.49389	nd		3.32455	4.275	5.443	5.21919	5.54777
	Stainless steel						Glass						Polycarbonate
	Mean value
	log CFU/cm2	log CFU/cm2	log CFU/cm2	log CFU/cm2	log CFU/cm2		log CFU/cm2	log CFU/cm2	log CFU/cm2	log CFU/cm2	log CFU/cm2		log CFU/cm2	log CFU/cm2	log CFU/cm2	log CFU/cm2	log CFU/cm2
time (day )	20016	20011	2601	20207	20081		20016	20011	2601	20207	20081		20016	20011	2601	20207	20081
0.5	3.1117	2.92048	3.61387	3.56225	3.47883		3.32756	3.19777	3.21217	3.66335	3.4711		3.53756	3.40777	3.42217	3.87335	3.6811
0.5	3.09964	2.93858	3.54284	3.63931	3.59863		3.52254	2.83944	3.31967	3.24401	3.88487		3.73254	3.04944	3.52967	3.45401	4.09487
1	4.70777	3.66335	4.40372	4.09348	4.39451		5.21593	3.58283	4.52713	4.59863	4.45789		5.42593	3.79283	4.73713	4.80863	4.66789
1	5.31284	3.86116	4.2261	4.09348	4.44428		5.34875	3.12919	4.59863	4.56644	4.5706		5.55875	3.33919	4.80863	4.77644	4.7806
2	6.75217	4.88185	6.38192	6.46322	6.51555		6.16007	3.26541	6.60631	6.7255	6.49142		6.37007	3.47541	6.81631	6.9355	6.70142
2	6.52254	4.42447	6.61945	6.49389	6.57879		5.47369	3.62859	6.68929	6.65321	6.55157		5.68369	3.83859	6.89929	6.86321	6.76157
3	6.7255	4.18288	6.61945	6.73268	6.66168		5.85476	3.98077	6.69554	6.7255	6.54941		6.06476	5.19077	5.90554	5.9355	4.75941
3	6.68929	4.22151	6.72694	6.76689	6.66998		4.99657	4.12344	6.66335	6.48391	6.41864		5.20657	5.33344	5.87335	6.29391	5.22864
	Stainless steel						Glass						Polycarbonate
	Mean value
	log CFU/cm2	log CFU/cm2	log CFU/cm2	log CFU/cm2	log CFU/cm2
time (day )	8585	YA796	w21	w40	w45		8585	YA796	w21	w40	w45		8585	YA796	w21	w40	w45
0.5	na	na	na	na	na		na	na	na	na	na		na	na	na	na	na
0.5	na	na	na	na	na		na	na	na	na	na		na	na	na	na	na
1	na	na	na	2.5	na		na	na	na	2.53	na		na	na	na	2.25	na
1	na	na	na	2.88	na		na	na	na	2.54	na		na	na	na	2.05	na
2	na	2.98	2.99	3.889	2.05		na	2.54	2.9	3.775	na		na	2.38	2.85	3.64	na
2	na	2.94	3.11	3.364	na		na	2.63	3.08	3.46	na		na	2.457	3.21	3.5	na
3	na	2.9	3.084	4.594	2.862		na	2.869	3.17	4.59	3.008		na	2.795	2.975	4.269	4.095
3	na	3.102	3.384	4.134	3.262		na	3.102	3.384	5.097	3.608		na	3.105	3.575	4.037	3.695

## Sheet: phase 2
							log CFU/cm2	log CFU/cm2	log CFU/cm2	log CFU/cm2
	After 1 day
		pH	Agitation	Surfactants	Cellular growth phase	Temperature	20088	20016	20088	20016
	A	-1	1	1	-1	-1	0	0	0	0
	B	1	1	-1	1	-1	0	0	0	0
	C	1	-1	-1	-1	-1	0	0	0	0
	D	1	1	1	1	1	0	0	0	0
	E	-1	1	-1	-1	1	3.037	2.905	3.22	3.34
	F	-1	-1	1	1	-1	0	0	0	0
	G	1	-1	1	-1	1	0	0	0	0
	H	-1	-1	-1	1	1	3.5	2.77	3.39	3.18
	After 2 days
		pH	Agitation	Surfactants	Cellular growth phase	Temperature	20088	20016	20088	20016
	A	-1	1	1	-1	-1	0	0	0	0
	B	1	1	-1	1	-1	0	0	0	0
	C	1	-1	-1	-1	-1	0	0	0	0
	D	1	1	1	1	1	0	0	0	0
	E	-1	1	-1	-1	1	4.02	4.09	5.004	5.25
	F	-1	-1	1	1	-1	0	0	0	0
	G	1	-1	1	-1	1	0	0	0	0
	H	-1	-1	-1	1	1	4.75	5.22	5.1	5.18
	After 3 days
		pH	Agitation	Surfactants	Cellular growth phase	Temperature	20088	20016	20088	20016
	A	-1	1	1	-1	-1	0	0	0	0
	B	1	1	-1	1	-1	0	0	0	0
	C	1	-1	-1	-1	-1	0	0	0	0
	D	1	1	1	1	1	0	0	0	0
	E	-1	1	-1	-1	1	4.008	5.09	5.584	5.69
	F	-1	-1	1	1	-1	0	0	0	0
	G	1	-1	1	-1	1	0	0	0	0
	H	-1	-1	-1	1	1	4.9	5.48	5.313	5.48

## Sheet: phase 3
											log CFU/cm2	log CFU/cm2	log CFU/cm2	log CFU/cm2	log CFU/cm2	log CFU/cm2	log CFU/cm2	log CFU/cm2
											SDS				PS80
		pH	Temperature (T)	Surfactant (S)	pH2	T2	S2	pH*T	pH*S	T*S	20088	20088	20016	20016	20088	20088	20016	20016
	1	7	40	1.5	49	1600	2.25	280	10.5	60	0	0	0	0	6.41	6.39	nd	nd
	2	7	40	0.5	49	1600	0.25	280	3.5	20	0	0	0	0	5.66	5.45	2.53	2.6
	3	7	20	1.5	49	400	2.25	140	10.5	30	0	0	3.83944	3.77	5.48	5.52	5.5	5.35
	4	7	20	0.5	49	400	0.25	140	3.5	10	0	0	0	0	5.68	5.73	5.2	5.18
	5	5	40	1.5	25	1600	2.25	200	7.5	60	0	0	0	0	5.96	5.89	5.02	5.11
	6	5	40	0.5	25	1600	0.25	200	2.5	20	1.50365	1.494	0	0	5.87	5.93	4.7	4.69
	7	5	20	1.5	25	400	2.25	100	7.5	30	0	0	0	0	5.36	5.39	6.01	6.11
	8	5	20	0.5	25	400	0.25	100	2.5	10	0	0	2.88185	2.58	4.72	4.69	4.84	4.89
	9	6	30	1	36	900	1	180	6	30	1.85044	1.777	0	0	6.23	6.17	6.73	6.7
	10	6	30	0	36	900	0	180	0	0	5.94298	5.85	5.94298	5.85	6.01	6.12	5.82	5.88
	11	6	30	2	36	900	4	180	12	60	0	0	0	0	6.46	6.42	6.84	6.77
	12	6	10	1	36	100	1	60	6	10	0	0	0	0	nd	nd	nd	nd
	13	6	50	1	36	2500	1	300	6	50	0	0	0	0	nd	nd	nd	nd
	14	4	30	1	16	900	1	120	4	30	0	0	0	0	5.94	5.9	6.37	6.35
	15	8	30	1	64	900	1	240	8	30	0	0	0	0	3.91	3.89	4.55	4.49
	16	6	30	1	36	900	1	180	6	30	1.85044	1.777	0	0	6.23	6.17	6.73	6.7
	17	6	30	1	36	900	1	180	6	30	1.85044	1.777	0	0	6.23	6.17	6.73	6.7

## Sheet: phase 4
L. monocytogenes
		hour	mean log CFU/ml	mean log CFU/ml	mean log CFU/ml
		time	ACT 20088	ACT 20016	CNT
		0	2.5	2.5	2.5
		3	4.055	4.271	4.244
		6	6.015	6.008	6.447
		24	6.933	7.209	7.963
		30	7.035	7.292	7.881
		48	7.013	7.257	7.955
