# Supplementary material for: Use of design of experiments to optimize the production of microbial probiotic biofilms
Source: PeerJ. 2018 Jul 10;6:e4826. doi: 10.7717/peerj.4826 (PMC6044272; doi:10.7717/peerj.4826)
Supplement: Supplemental Information 2 [file peerj-06-4826-s002.xlsx]

## Sheet: phase 1
	Stainless steel						Glass						Polycarbonate
	Mean value
	log CFU/cm2	log CFU/cm2	log CFU/cm2	log CFU/cm2	log CFU/cm2		log CFU/cm2	log CFU/cm2	log CFU/cm2	log CFU/cm2	log CFU/cm2		log CFU/cm2	log CFU/cm2	log CFU/cm2	log CFU/cm2	log CFU/cm2
time (day )	10140	20213	20096	20088	20219		10140	20213	20096	20088	20219		10140	20213	20096	20088	20219
0.5	3.0044	2.8993	3.3517	1.9464	2.7545		3.1141	3.069	2.993	2.9464	2.8945		3.309	2.9441	3.1935	2.8041	3.4235
0.5	3.2314	3.1844	3.6532	2.2844	3.0973		3.3534	3.359	3.1875	3.18	3.1714		3.599	3.1834	3.4831	3.0434	3.7131
1	4.1018	4.10181	4.4687	5.7363	4.6509		4.2887	4.2278	4.9738	4.3875	4.3616		4.4678	4.1187	4.3518	3.9787	4.5818
1	4.203	4.203	4.6561	5.6786	4.3989		4.7231	4.6939	4.3314	4.4386	4.2914		4.9339	4.5531	4.8179	4.4131	5.0479
2	4.8429	4.7434	5.2822	7.0285	5.2891		5.1073	5.061	4.566	5.5902	4.8616		5.3015	4.9373	5.1855	4.7973	5.4155
2	4.6526	4.4092	5.6042	6.5557	5.1827		4.015	4.7817	4.7091	4.6622	4.2035		5.0217	3.8454	4.9057	4.7054	5.1357
3	4.4509	4.4845	4.4304	6.2274	4.4914		4.091	4.672	4.719	5.0232	4.2634		4.2127	3.9211	4.7967	4.7811	5.0267
3	4.8235	4.3952	5.4648	5.9402	4.9027		4.153	4.62	4.7738	5.5008	4.36		3.3315	4.282	5.45	5.2261	5.5547
	Stainless steel						Glass						Polycarbonate
	Mean value
	log CFU/cm2	log CFU/cm2	log CFU/cm2	log CFU/cm2	log CFU/cm2		log CFU/cm2	log CFU/cm2	log CFU/cm2	log CFU/cm2	log CFU/cm2		log CFU/cm2	log CFU/cm2	log CFU/cm2	log CFU/cm2	log CFU/cm2
time (day )	20016	20011	2601	20207	20081		20016	20011	2601	20207	20081		20016	20011	2601	20207	20081
0.5	3.2123	2.8119	3.6154	3.6992	3.3798		3.4281	3.0892	3.2137	3.8003	3.372		3.6381	3.2992	3.4237	4.01	3.582
0.5	3.2002	2.83	3.5444	3.7763	3.4996		3.6231	2.7309	3.3212	3.381	3.7858		3.8331	2.9409	3.5312	3.591	3.9958
1	4.8083	3.5548	4.4053	4.2304	4.2955		5.3165	3.4743	4.5287	4.7356	4.3588		5.5265	3.6843	4.7387	4.9456	4.5688
1	5.4134	3.7526	4.2277	4.2304	4.3452		5.4493	3.0206	4.6002	4.7034	4.4715		5.6593	3.2306	4.8102	4.9134	4.6815
2	6.8527	4.7733	6.3835	6.6002	6.4165		6.2606	3.1569	6.6079	6.8625	6.3924		6.4706	3.3669	6.8179	7.0725	6.6024
2	6.6231	4.3159	6.621	6.6308	6.4797		5.5742	3.52	6.6908	6.7902	6.4525		5.7842	3.73	6.9008	7.0002	6.6625
3	6.8261	4.0743	6.621	6.8696	6.5626		5.9553	3.8722	6.6971	6.8625	6.4504		6.1653	5.0822	5.9071	6.0725	4.6604
3	6.7898	4.113	6.7285	6.9038	6.5709		5.0971	4.0149	6.6649	6.6209	6.3196		5.3071	5.2249	5.8749	6.4309	5.1296
	Stainless steel						Glass						Polycarbonate
	Mean value
	log CFU/cm2	log CFU/cm2	log CFU/cm2	log CFU/cm2	log CFU/cm2
time (day )	8585	YA796	w21	w40	w45		8585	YA796	w21	w40	w45		8585	YA796	w21	w40	w45
0.5	na	na	na	na	na		na	na	na	na	na		na	na	na	na	na
0.5	na	na	na	na	na		na	na	na	na	na		na	na	na	na	na
1	na	na	na	na	na		na	na	na	na	na		na	na	na	na	na
1	na	na	na	na	na		na	na	na	na	na		na	na	na	na	na
2	na	na	na	na	na		na	na	na	na	na		na	na	na	3.21	na
2	na	na	2.95	2.99	na		na	2.987	2.965	3.98	na		na	2.2	na	na	na
3	na	2.75	3.01	3.54	na		na	na	na	3.86	2.97		na	na	2.84	3.998	na
3	na	3	na	3.8	2.9688		na	2.999	3.187	4.8	na		na	2.98	3.65	4.0122	3.775

## Sheet: phase 2
							log CFU/cm2	log CFU/cm2	log CFU/cm2	log CFU/cm2
	After 1 day
		pH	Agitation	Surfactants	Cellular growth phase	Temperature	20088	20016	20088	20016
	A	-1	1	1	-1	-1	0	0	0	0
	B	1	1	-1	1	-1	0	0	0	0
	C	1	-1	-1	-1	-1	0	0	0	0
	D	1	1	1	1	1	0	0	0	0
	E	-1	1	-1	-1	1	3.095	2.963	3.278	3.398
	F	-1	-1	1	1	-1	0	0	0	0
	G	1	-1	1	-1	1	0	0	0	0
	H	-1	-1	-1	1	1	3.461	2.731	3.351	3.141
	After 2 days
		pH	Agitation	Surfactants	Cellular growth phase	Temperature	20088	20016	20088	20016
	A	-1	1	1	-1	-1	0	0	0	0
	B	1	1	-1	1	-1	0	0	0	0
	C	1	-1	-1	-1	-1	0	0	0	0
	D	1	1	1	1	1	0	0	0	0
	E	-1	1	-1	-1	1	4.078	4.148	5.062	5.308
	F	-1	-1	1	1	-1	0	0	0	0
	G	1	-1	1	-1	1	0	0	0	0
	H	-1	-1	-1	1	1	4.711	5.181	5.061	5.141
	After 3 days
		pH	Agitation	Surfactants	Cellular growth phase	Temperature	20088	20016	20088	20016
	A	-1	1	1	-1	-1	0	0	0	0
	B	1	1	-1	1	-1	0	0	0	0
	C	1	-1	-1	-1	-1	0	0	0	0
	D	1	1	1	1	1	0	0	0	0
	E	-1	1	-1	-1	1	4.066	5.148	5.642	5.748
	F	-1	-1	1	1	-1	0	0	0	0
	G	1	-1	1	-1	1	0	0	0	0
	H	-1	-1	-1	1	1	4.861	5.441	5.274	5.441

## Sheet: phase 3
											log CFU/cm2	log CFU/cm2	log CFU/cm2	log CFU/cm2	log CFU/cm2	log CFU/cm2	log CFU/cm2	log CFU/cm2
											SDS				PS80
		pH	Temperature (T)	Surfactant (S)	pH2	T2	S2	pH*T	pH*S	T*S	20088	20088	20016	20016	20088	20088	20016	20016
	1	7	40	1.5	49	1600	2.25	280	10.5	60	0	0	0	0	6.464	6.267	0	0
	2	7	40	0.5	49	1600	0.25	280	3.5	20	0	0	0	0	5.714	5.327	2.641	2.401
	3	7	20	1.5	49	400	2.25	140	10.5	30	0	0	3.7164	3.859	5.534	5.397	5.611	5.151
	4	7	20	0.5	49	400	0.25	140	3.5	10	0	0	0	0	5.734	5.607	5.311	4.981
	5	5	40	1.5	25	1600	2.25	200	7.5	60	0	0	0	0	6.014	5.767	5.131	4.911
	6	5	40	0.5	25	1600	0.25	200	2.5	20	1.6466	1.419	0	0	5.924	5.807	4.811	4.491
	7	5	20	1.5	25	400	2.25	100	7.5	30	0	0	0	0	5.414	5.267	6.121	5.911
	8	5	20	0.5	25	400	0.25	100	2.5	10	0	0	2.7588	2.669	4.774	4.567	4.951	4.691
	9	6	30	1	36	900	1	180	6	30	1.9934	1.702	0	0	6.284	6.047	6.841	6.501
	10	6	30	0	36	900	0	180	0	0	6.0859	5.775	5.8199	5.939	6.064	5.997	5.931	5.681
	11	6	30	2	36	900	4	180	12	60	0	0	0	0	6.514	6.297	6.951	6.571
	12	6	10	1	36	100	1	60	6	10	0	0	0	0	0	0	0	0
	13	6	50	1	36	2500	1	300	6	50	0	0	0	0	0	0	0	0
	14	4	30	1	16	900	1	120	4	30	0	0	0	0	5.994	5.777	6.481	6.151
	15	8	30	1	64	900	1	240	8	30	0	0	0	0	3.964	3.767	4.661	4.291
	16	6	30	1	36	900	1	180	6	30	1.9934	1.702	0	0	6.284	6.047	6.841	6.501
	17	6	30	1	36	900	1	180	6	30	1.9934	1.702	0	0	6.284	6.047	6.841	6.501

## Sheet: phase 4
L. monocytogenes
		hour	mean log CFU/ml	mean log CFU/ml	mean log CFU/ml
		time	ACT 20088	ACT 20016	CNT
		0	2.63	2.63	2.63
		3	4.038	4.254	4.227
		6	5.998	5.991	6.43
		24	7.063	7.339	8.093
		30	7.018	7.275	7.864
		48	7.143	7.387	8.085
